# Supplementary material
Source: PubMed Central journal article supplement (PMC6751725)
Supplement: ao9b01648_si_001.pdf [file ao9b01648_si_001.pdf]

## Supporting Information

# True Photoreactivity Origin of $\text{Ti}^{3+}$ -Doped Anatase $\text{TiO}_2$ Crystals with Respectively Dominated Exposed $\{001\}$ , $\{101\}$ and $\{100\}$ Facets

Xiaogang Liu,<sup>\*a</sup> Guiru Du <sup>a</sup> and Meng Li <sup>b</sup>

a. College of Chemistry and Chemical Engineering, Xinyang Normal University,

Xinyang, Henan 464000, P. R. China.

b. Business School, Xinyang Normal University, Xinyang, Henan 464000, P. R.

China.

### Additional figures and tables.

**Table S1.** Average exposed percentages of {001}, {101} and {100} facet in R-TiO<sub>2</sub>-001, R-TiO<sub>2</sub>-101 and R-TiO<sub>2</sub>-101, calculated from the surface areas of each facet from SEM and TEM images.

| Sample                  | {001} | {101} | {100} |
|-------------------------|-------|-------|-------|
| R-TiO <sub>2</sub> -001 | 82%   | 18%   | 0     |
| R-TiO <sub>2</sub> -101 | 14%   | 86%   | 0     |
| R-TiO <sub>2</sub> -100 | 4%    | 12%   | 84%   |

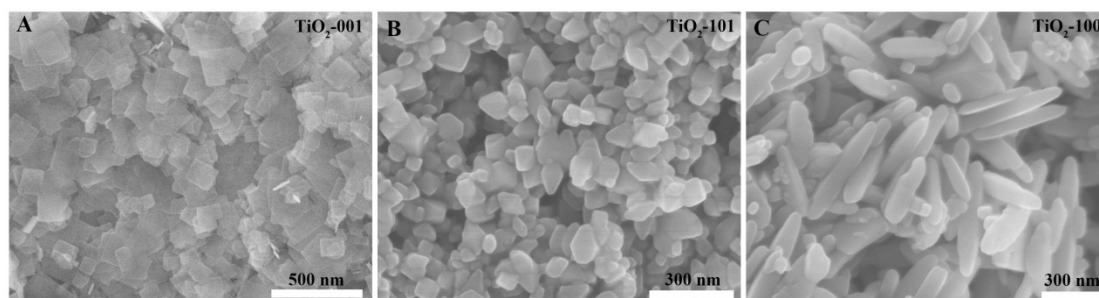

**Figure S1.** SEM images of TiO<sub>2</sub> samples with different dominant facets: A) TiO<sub>2</sub>-001; B) TiO<sub>2</sub>-101 and C) TiO<sub>2</sub>-100.

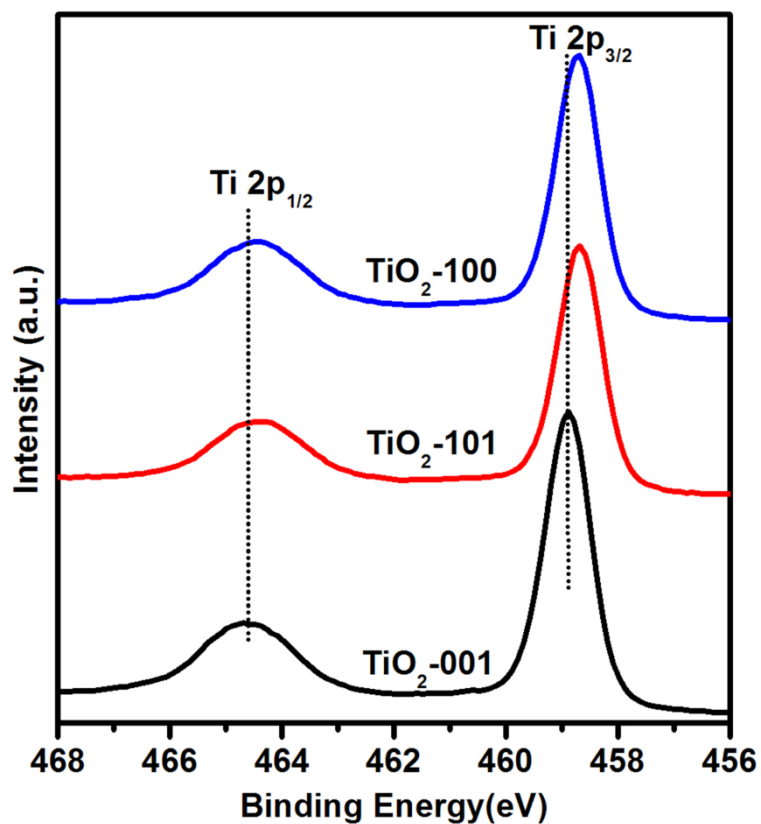

**Figure S2.** XPS spectra of Ti 2p for TiO<sub>2</sub> with different predominated exposed facets before Al reduction.

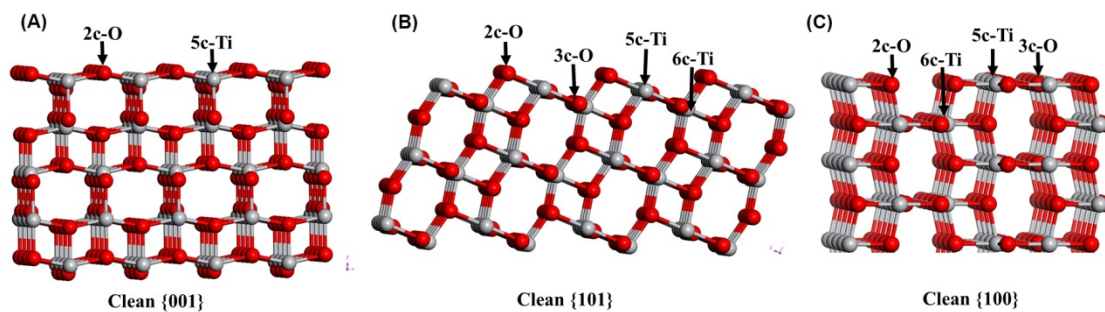

**Figure S3.** Schematic of atomic surface structure of anatase  $\text{TiO}_2$  with (A) clean  $\{001\}$ , (B) clean  $\{101\}$  and (C) clean  $\{100\}$  facets.

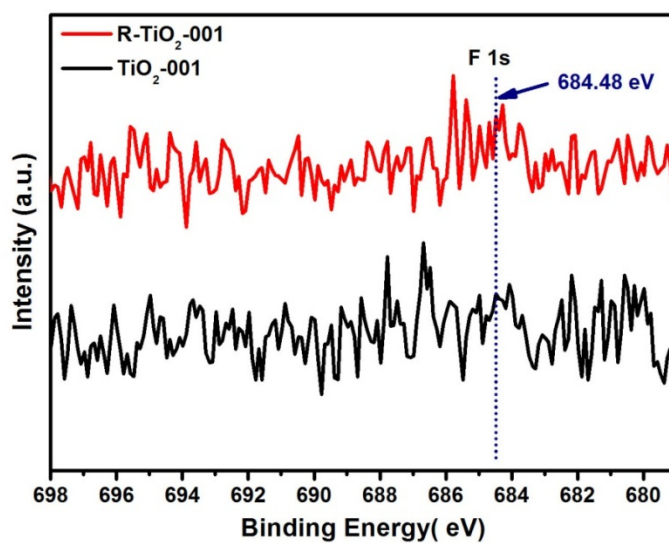

**Figure S4.** The F 1s XPS spectra of R- $\text{TiO}_2$ -001 and  $\text{TiO}_2$ -001 sample.

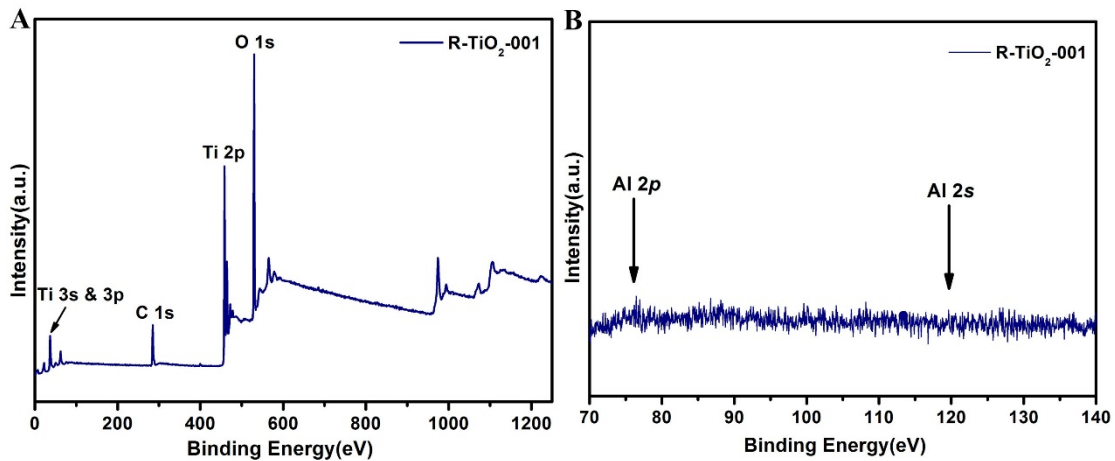

**Figure S5.** XPS survey spectra (A) and Al element analysis (B) of of R-TiO<sub>2</sub>-001 sample.

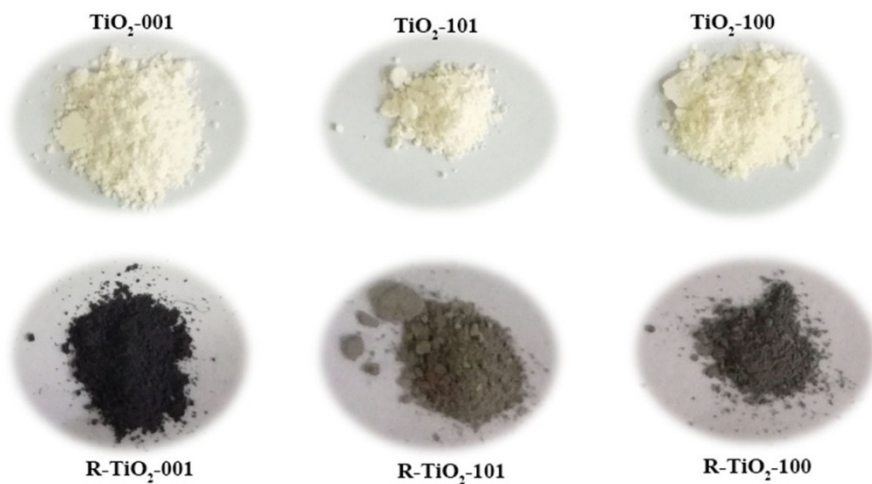

**Figure S6.** The digital photography of prepared TiO<sub>2</sub> samples before and after Al reduction.

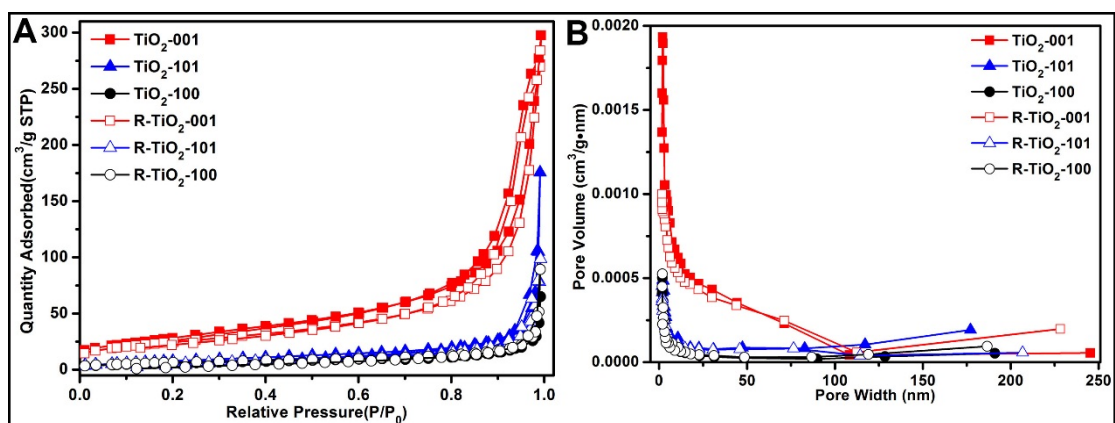

**Figure S7.** N<sub>2</sub> adsorption-desorption isotherm (A) and pore size distribution (B) of prepared TiO<sub>2</sub> nanocrystals before and after Al reduction.

**Table S2.** BET surface areas and pore parameters of prepared TiO<sub>2</sub> samples before and after Al reduction.

| Samples                 | S <sub>BET</sub> (cm <sup>2</sup> /g) | Pore Volume(cm <sup>3</sup> /g) | Pore Size(nm) |
|-------------------------|---------------------------------------|---------------------------------|---------------|
| TiO <sub>2</sub> -001   | 25.1059                               | 0.044919                        | 7.38264       |
| R-TiO <sub>2</sub> -001 | 21.7914                               | 0.040023                        | 7.34654       |
| TiO <sub>2</sub> -101   | 31.7491                               | 0.084714                        | 10.67288      |
| R-TiO <sub>2</sub> -101 | 24.3378                               | 0.066210                        | 10.54896      |
| TiO <sub>2</sub> -100   | 103.7212                              | 0.310701                        | 11.98215      |
| R-TiO <sub>2</sub> -100 | 99.5281                               | 0.274669                        | 12.27187      |

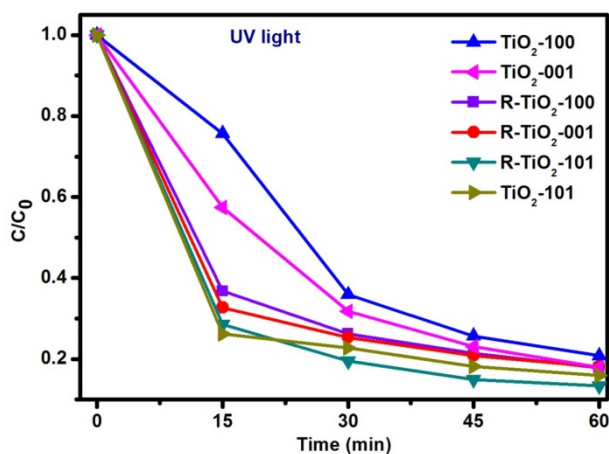

**Figure S8.** The degradation curves of phenol over different photocatalysts under ultraviolet-light irradiation..

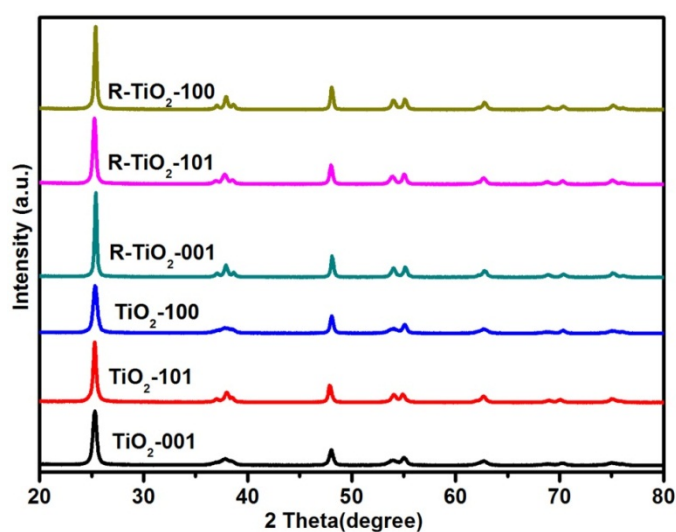

**Figure S9.** Re-tested XRD patterns for TiO<sub>2</sub> and reduced TiO<sub>2</sub> nanocrystals after photocatalytic performance evaluation.

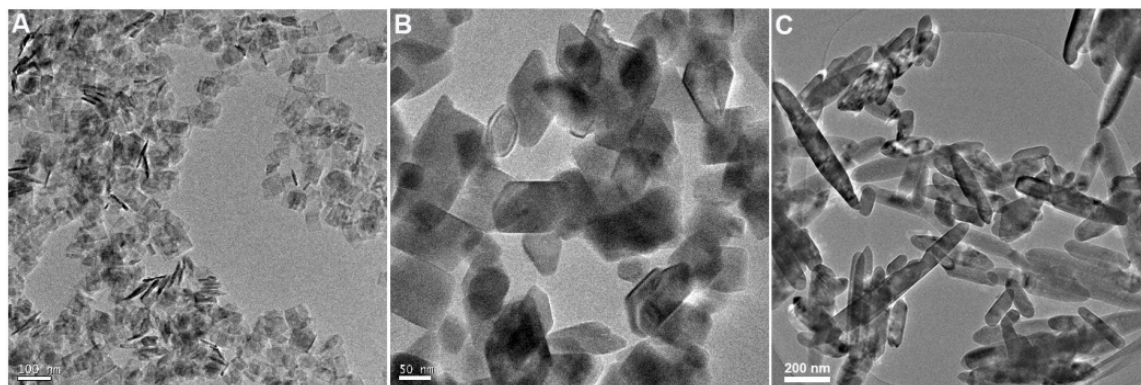

**Figure S10.** TEM images of (A) R-TiO<sub>2</sub>-001, (B) R-TiO<sub>2</sub>-101 and (C) R-TiO<sub>2</sub>-100 after photocatalytic performance tests.

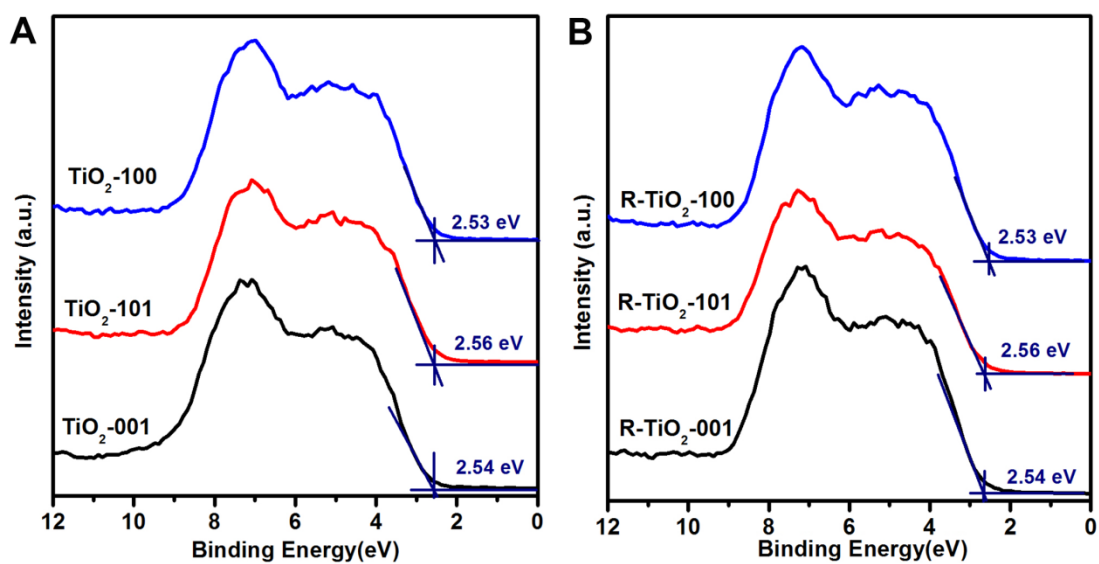

**Figure S11.** XPS valence band spectrum of as prepared TiO<sub>2</sub> with different dominant exposed facets before (A) and after (B) Ti<sup>3+</sup> doping.

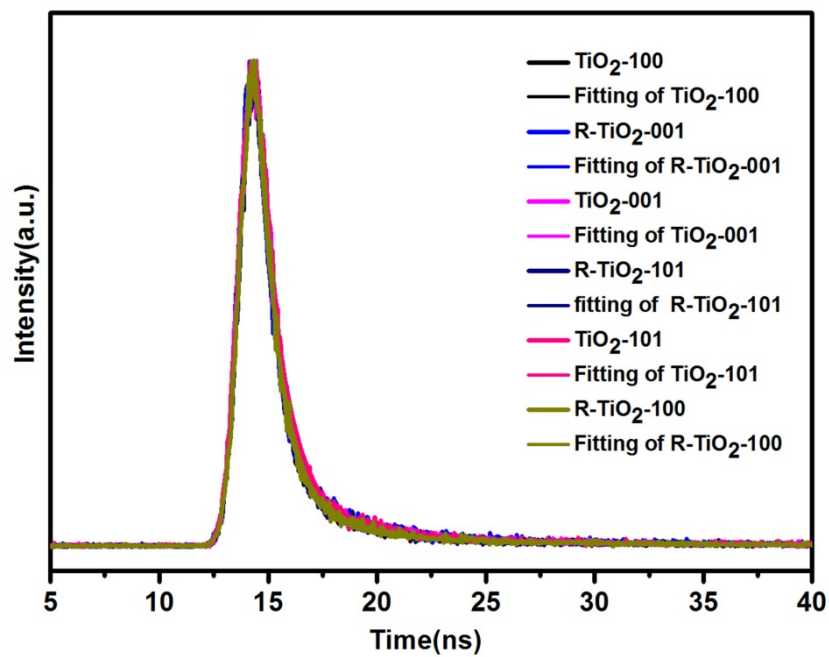

**Figure S12.** Time-resolved fluorescence decay spectra of prepared TiO<sub>2</sub> samples.
